# Supplementary material for: Unambiguous NMR Structural Determination of (+)-Catechin—Laccase Dimeric Reaction Products as Potential Markers of Grape and Wine Oxidation
Source: MDPI journal article supplement (doi:10.3390/molecules26206165), 2021-10-13

Supplementary Materials for

# Unambiguous NMR Structural Determination of (+)- Catechin-Laccase Dimeric Reaction Products as Potential Markers of Grape and Wine Oxidation.

Stacy Deshaies, Christine Le Guernevé, Lucas Suc, Laetitia Mouls, François Garcia  
and Cédric Saucier

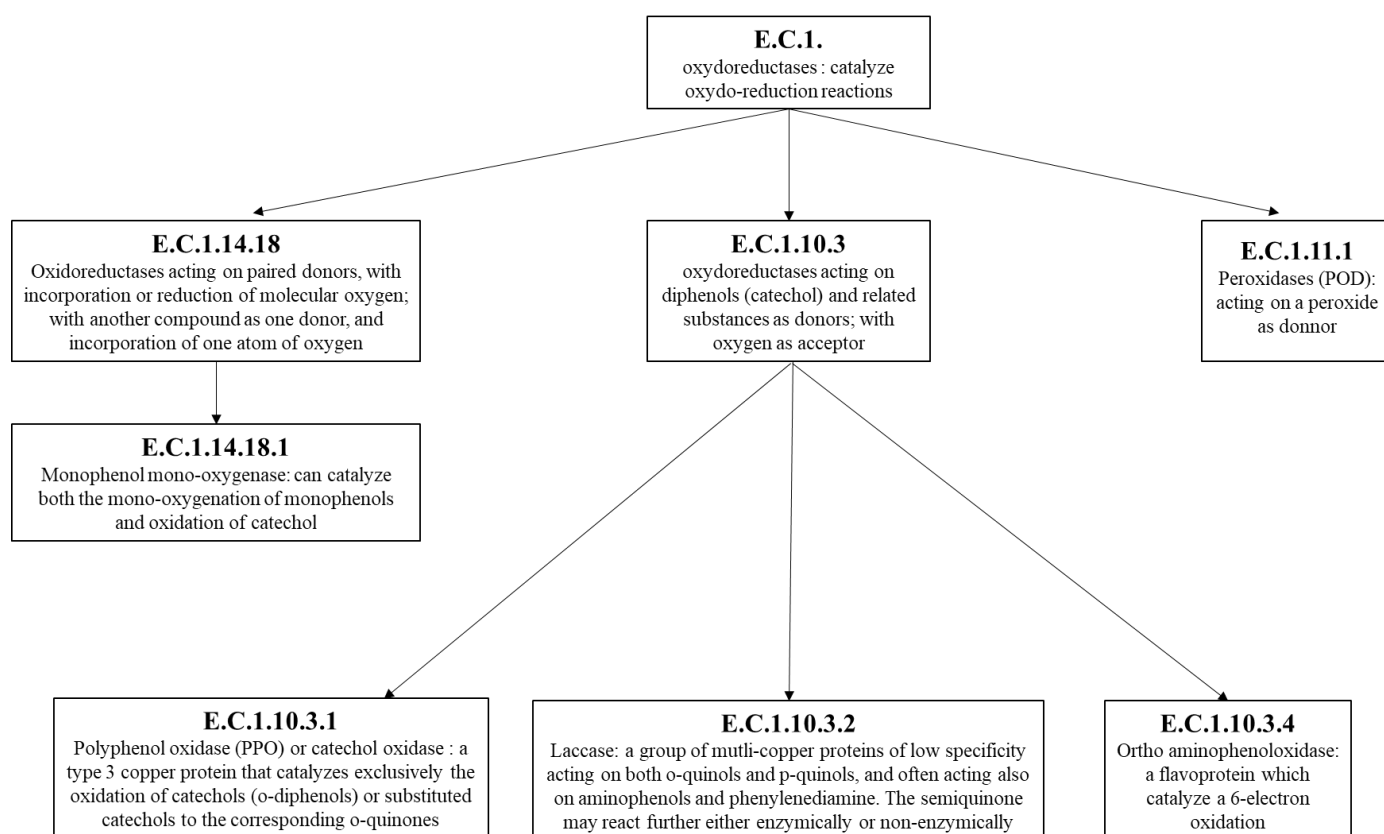

**Figure S1.** Classification of enzymes responsible for enzymatic browning

**Table S1.**  $^1\text{H}$  and  $^{13}\text{C}$  NMR assignments of compounds N2, N3, N4, N6 and N8. The analyses were carried out in the solvent acetone- $d_6$

| Compound | ring | H/C<br>position | Chemical<br>shift/ppm<br>( $\delta\text{H}$ ) | Multiplicity<br>pattern | J-coupling/Hz         | Chemical<br>shift/ppm<br>( $\delta\text{C}$ ) |
|----------|------|-----------------|-----------------------------------------------|-------------------------|-----------------------|-----------------------------------------------|
| N2       | A-u  | 4a              | -                                             | -                       | -                     | 100.08                                        |
|          |      | 5 (OH)          | 8.17                                          | s                       | -                     | 156.76                                        |
|          |      | 6               | 5.96                                          | d                       | 2.29 ( $^4\text{J}$ ) | 95.53                                         |
|          |      | 7 (OH)          | 8.02                                          | s                       | -                     | 157.24                                        |

|           |            |         |      |    |                                                  |        |
|-----------|------------|---------|------|----|--------------------------------------------------|--------|
|           |            | 8       | 5.79 | d  | 2.29 ( <sup>4</sup> J)                           | 95.13  |
|           |            | 8a      | -    | -  | -                                                | 157.03 |
|           | <b>C-u</b> | 2       | 4.54 | d  | 2.17 ( <sup>3</sup> J)                           | 67.92  |
|           |            | 3       | 4.03 | m  | -                                                | 67.95  |
|           |            | 3 (OH)  | 4.33 | s  |                                                  |        |
|           |            | 4α      | 2.89 | dd | 15.08 ( <sup>2</sup> J) / 5.41 ( <sup>3</sup> J) | 28.93  |
|           |            | 4β      | 2.38 | dd | 15.85 ( <sup>2</sup> J) / 8.79 ( <sup>3</sup> J) |        |
|           | <b>B-u</b> | 1'      | -    | -  | -                                                | 130.94 |
|           |            | 2'      | -    | -  | -                                                | 122.17 |
|           |            | 3' (OH) | 7.04 | s  | -                                                | 143.53 |
|           |            | 4' (OH) | 7.79 | s  | -                                                | 144.96 |
|           |            | 5'      | 6.76 | d  | 8.34 ( <sup>3</sup> J)                           | 115.00 |
|           |            | 6'      | 6.81 | d  | 8.36 ( <sup>3</sup> J)                           | 118.63 |
|           | <b>A-l</b> | 4a      | -    | -  | -                                                | 100.93 |
|           |            | 5 (OH)  | 8.35 | s  | -                                                | 156.49 |
|           |            | 6       | 6.13 | s  | -                                                | 96.71  |
|           |            | 7 (OH)  | 7.47 | s  | -                                                | 155.05 |
|           |            | 8       | -    | -  | -                                                | 101.96 |
|           |            | 8a      | -    | -  | -                                                | 153.78 |
|           | <b>C-l</b> | 2       | 4.52 | d  | 1.89 ( <sup>3</sup> J)                           | 67.96  |
|           |            | 3       | 3.92 | m  | -                                                | 67.91  |
|           |            | 3 (OH)  | 4.08 | s  | -                                                |        |
|           |            | 4α      | 2.93 | dd | 15.08 ( <sup>2</sup> J) / 5.22 ( <sup>3</sup> J) | 28.37  |
|           |            | 4β      | 2.54 | dd | 16.53 ( <sup>2</sup> J) / 8.77 ( <sup>3</sup> J) |        |
|           | <b>B-l</b> | 1'      | -    | -  | -                                                | 131.97 |
|           |            | 2'      | 6.89 | d  | 1.78 ( <sup>4</sup> J)                           | 114.57 |
|           |            | 3' (OH) | 7.86 | s  | -                                                | 145.07 |
|           |            | 4' (OH) | 7.74 | s  | -                                                | 145.07 |
|           |            | 5'      | 6.70 | d  | 8.09 ( <sup>3</sup> J)                           | 115.09 |
|           |            | 6'      | 6.73 | dd | 8.79 ( <sup>3</sup> J) / 1.79 ( <sup>4</sup> J)  | 119.79 |
| <b>N3</b> | <b>A-u</b> | 4a      | -    | -  | -                                                | 100.67 |
|           |            | 5 (OH)  | 8.32 | s  | -                                                | 157.18 |
|           |            | 6       | 6.01 | d  | 2.26 ( <sup>4</sup> J)                           | 96.22  |
|           |            | 7 (OH)  | 8.08 | s  | -                                                | 157.79 |
|           |            | 8       | 5.82 | d  | 2.22 ( <sup>4</sup> J)                           | 96.42  |
|           |            | 8a      | -    | -  | -                                                | 196.92 |
|           | <b>C-u</b> | 2       | 4.53 | d  | 8.38 ( <sup>3</sup> J)                           | 82.80  |
|           |            | 3       | 3.99 | m  | -                                                | 68.47  |
|           |            | 3 (OH)  | 4.33 | s  | -                                                |        |
|           |            | 4α      | 2.98 | dd | 16.24 ( <sup>2</sup> J) / 5.89 ( <sup>3</sup> J) | 29.42  |
|           |            | 4β      | 2.52 | dd | 15.81 ( <sup>2</sup> J) / 9.36 ( <sup>3</sup> J) |        |
|           |            |         |      |    |                                                  |        |
|           | <b>B-u</b> | 1'      | -    | -  | -                                                | 131.57 |
|           |            | 2'      | 7.00 | d  | 1.92 ( <sup>4</sup> J)                           | 116.45 |

|             |            |         |                      |    |                                                  |        |
|-------------|------------|---------|----------------------|----|--------------------------------------------------|--------|
|             |            | 3'      | -                    | -  | -                                                | 147.32 |
|             |            | 4' (OH) | 7.90                 | s  | -                                                | 147.34 |
|             |            | 5'      | 6.805                | d  | 8.14 ( <sup>3</sup> J)                           | 116.45 |
|             |            | 6'      | 6.94                 | dd | 8.06 ( <sup>3</sup> J) / 1.9 ( <sup>4</sup> J)   | 122.43 |
|             | <b>A-l</b> | 4a      | -                    | -  | -                                                | 101.69 |
|             |            | 5 (OH)  | 8.32                 | s  | -                                                | 153.27 |
|             |            | 6       | 6.15                 | s  | -                                                | 96.18  |
|             |            | 7 (OH)  | 8.2                  | s  | -                                                | 149.62 |
|             |            | 8       | -                    | -  | -                                                | 124.97 |
|             |            | 8a      | -                    | -  | -                                                | 149.00 |
|             | <b>C-l</b> | 2       | 4.62                 | d  | 7.57 ( <sup>3</sup> J)                           | 82.71  |
|             |            | 3       | 3.96                 | m  | -                                                | 68.20  |
|             |            | 3 (OH)  | 4.08                 | s  | -                                                |        |
|             |            | 4α      | 2.90                 | dd | 16.42 ( <sup>2</sup> J) / 5.18 ( <sup>3</sup> J) | 28.6   |
|             |            | 4β      | 2.58                 | dd | 16.38 ( <sup>2</sup> J) / 8.23 ( <sup>3</sup> J) |        |
|             | <b>B-l</b> | 1'      | -                    | -  | -                                                | 131.63 |
|             |            | 2'      | 6.75                 | d  | 1.85 ( <sup>4</sup> J)                           | 114.81 |
|             |            | 3' (OH) | 7.95                 | s  | -                                                | 145.44 |
|             |            | 4' (OH) | 7.74                 | s  | -                                                | 145.78 |
|             |            | 5'      | 6.67                 | d  | 8.12 ( <sup>3</sup> J)                           | 115.58 |
|             |            | 6'      | 6.63                 | dd | 8.15 ( <sup>3</sup> J) / 1.85 ( <sup>4</sup> J)  | 120.23 |
| <b>N4-A</b> | <b>A-u</b> | 4a      | -                    | -  | -                                                | 100.71 |
|             |            | 5 (OH)  | 8.30                 | s  | -                                                | 157.26 |
|             |            | 6       | 6.02                 | d  | 2.33 ( <sup>4</sup> J)                           | 96.16  |
|             |            | 7 (OH)  | 8.08                 | s  | -                                                | 157.76 |
|             |            | 8       | 5.9                  | d  | 2.29 ( <sup>4</sup> J)                           | 95.5   |
|             | <b>C-u</b> | 8a      | -                    | -  | -                                                | 154.05 |
|             |            | 2       | 4.57                 | d  | 6.13 ( <sup>3</sup> J)                           | 83.15  |
|             |            | 3       | 4.09                 | m  | -                                                |        |
|             |            | 3 (OH)  | 4.34 or<br>under H3C | s  | -                                                | 68.83  |
|             |            | 4α      | 2.96                 | dd | 16.39 ( <sup>2</sup> J) / 7.12 ( <sup>3</sup> J) | 28.91  |
|             |            | 4β      | 2.55                 | dd | 15.53 ( <sup>2</sup> J) / 8.95 ( <sup>3</sup> J) |        |
|             | <b>B-u</b> | 1'      | -                    | -  | -                                                | 123.79 |
|             |            | 2'      | 6.80                 | d  | 2.21 ( <sup>4</sup> J)                           | 114.25 |
|             |            | 3' (OH) | 7.65                 | s  | -                                                | 146.36 |
|             |            | 4' (OH) | 7.30                 | s  | -                                                | 143.94 |
|             |            | 5'      | -                    | -  | -                                                | 121.33 |
|             | <b>A-l</b> | 6'      | 6.85                 | d  | 2.24 ( <sup>4</sup> J)                           | 157.08 |
|             |            | 4a      | -                    | -  | -                                                | 100.89 |
|             |            | 5 (OH)  | 8.41                 | s  | -                                                | 156.79 |
|             |            | 6       | 6.15                 | s  | -                                                | 96.55  |
|             |            | 7 (OH)  | 7.43                 | s  | -                                                | 155.05 |
|             |            | 8       | -                    | -  | -                                                | 104.99 |
|             |            | 8a      | -                    | -  | -                                                | 153.84 |

|             |            |            |                      |    |                                                    |        |
|-------------|------------|------------|----------------------|----|----------------------------------------------------|--------|
| <b>N4-B</b> | <b>C-l</b> | 2          | 4.73                 | d  | 6.21 ( <sup>3</sup> J)                             | 81.93  |
|             |            | 3          | 4.06                 | m  | -                                                  |        |
|             |            | 3 (OH)     | 4.34 or<br>under H3C | s  | -                                                  | 67.66  |
|             |            | 4 $\alpha$ | 2.84                 | dd | 16.63 ( <sup>2</sup> J) / 5.1 ( <sup>3</sup> J)    |        |
|             |            | 4 $\beta$  | 2.62                 | dd | 10.47 ( <sup>2</sup> J) / 6.94 ( <sup>3</sup> J)   | 28.02  |
|             |            |            |                      |    |                                                    |        |
|             | <b>B-l</b> | 1'         | -                    | -  | -                                                  | 131.84 |
|             |            | 2'         | 6.84                 | d  | 1.83 ( <sup>4</sup> J)                             | 114.82 |
|             |            | 3' (OH)    | 8.08                 | s  | -                                                  | 145.45 |
|             |            | 4' (OH)    | 7.70                 | s  | -                                                  | 145.59 |
|             |            | 5'         | 6.72                 | d  | 8.48 ( <sup>3</sup> J)                             | 115.67 |
|             |            | 6'         | 6.69                 | dd | 8.04 ( <sup>3</sup> J) / 1.92 ( <sup>4</sup> J)    | 119.31 |
|             | <b>A-u</b> | 4a         | -                    | -  | -                                                  | 100.78 |
|             |            | 5 (OH)     | 8.26                 | s  | -                                                  | 157.17 |
|             |            | 6          | 6.00                 | d  | 2.37 ( <sup>4</sup> J)                             | 96.13  |
|             |            | 7 (OH)     | 8.08                 | s  | -                                                  | 157.71 |
|             |            | 8          | 5.82                 | d  | 2.34 ( <sup>4</sup> J)                             | 95.51  |
|             |            | 8a         | -                    | -  | -                                                  | 157.71 |
|             | <b>C-u</b> | 2          | 4.42                 | d  | 8.26 ( <sup>3</sup> J)                             | 83.07  |
|             |            | 3          | 3.82                 | m  | -                                                  |        |
|             |            | 3 (OH)     | 4.34 or<br>under H3C | s  | -                                                  | 68.86  |
|             |            | 4 $\alpha$ | 2.96                 | dd | 16.52 ( <sup>2</sup> J) /<br>8.63( <sup>3</sup> J) | 28.98  |
|             |            | 4 $\beta$  | 2.46                 | dd | 16.29 ( <sup>2</sup> J) / 9.1 ( <sup>3</sup> J)    |        |
|             |            |            |                      |    |                                                    |        |
|             | <b>B-u</b> | 1'         | -                    | -  | -                                                  | 124.51 |
|             |            | 2'         | 6.82                 | d  | 2.08 ( <sup>4</sup> J)                             | 113.30 |
|             |            | 3' (OH)    | 7.83                 | s  | -                                                  | 146.65 |
|             |            | 4' (OH)    | 7.29                 | s  | -                                                  | 144.45 |
|             |            | 5'         | -                    | -  | -                                                  | 122.01 |
|             |            | 6'         | 6.71                 | d  | 2.58 ( <sup>4</sup> J)                             | 157.02 |
|             | <b>A-l</b> | 4a         | -                    | -  | -                                                  | 101.03 |
|             |            | 5 (OH)     | 8.42                 | s  | -                                                  | 156.69 |
|             |            | 6          | 6.15                 | s  | -                                                  | 96.31  |
|             |            | 7 (OH)     | 7.23                 | s  | -                                                  | 155.06 |
|             |            | 8          | -                    | -  | -                                                  | 104.55 |
|             |            | 8a         | -                    | -  | -                                                  | 153.84 |
|             | <b>C-l</b> | 2          | 4.55                 | d  | 5.71 ( <sup>3</sup> J)                             | 82.93  |
|             |            | 3          | 3.99                 | m  | -                                                  |        |
|             |            | 3 (OH)     | 4.34 or<br>under H3C | s  | -                                                  | 68.25  |
|             |            | 4 $\alpha$ | 2.93                 | dd | 15.77 ( <sup>2</sup> J) /<br>6.55( <sup>3</sup> J) | 28.91  |
|             |            | 4 $\beta$  | 2.59                 | dd | 9.48 ( <sup>2</sup> J) / 6.32 ( <sup>3</sup> J)    |        |
|             |            |            |                      |    |                                                    |        |
|             | <b>B-l</b> | 1'         | -                    | -  | -                                                  | 132.10 |
|             |            | 2'         | 6.94                 | d  | 2.00 ( <sup>4</sup> J)                             | 115.08 |
|             |            | 3' (OH)    | 8.00                 | s  | -                                                  | 145.38 |
|             |            | 4' (OH)    | 7.79                 | s  | -                                                  | 145.61 |

|    |     |            |      |    |                                                  |        |
|----|-----|------------|------|----|--------------------------------------------------|--------|
|    |     | 5'         | 6.69 | d  | 8.23 ( <sup>3</sup> J)                           | 115.60 |
|    |     | 6'         | 6.77 | dd | 8.16 ( <sup>3</sup> J) / 2.04 ( <sup>4</sup> J)  | 120.05 |
| N6 | A-u | 4a         | -    | -  | -                                                | 100.66 |
|    |     | 5 (OH)     | 8.23 | s  | -                                                | 157.23 |
|    |     | 6          | 6.03 | d  | 2.04 ( <sup>4</sup> J)                           | 96.25  |
|    |     | 7 (OH)     | 8.03 | s  | -                                                | 157.80 |
|    |     | 8          | 5.89 | d  | 2.04 ( <sup>4</sup> J)                           | 95.49  |
|    |     | 8a         | -    | -  | -                                                | 156.86 |
|    | C-u | 2          | 4.60 | d  | 8.05 ( <sup>3</sup> J)                           | 82.63  |
|    |     | 3          | 4.01 | m  | -                                                | 68.36  |
|    |     | 3 (OH)     | 4.14 | s  | -                                                |        |
|    |     | 4 $\alpha$ | 2.96 | dd | 9.57 ( <sup>2</sup> J) / 5.62( <sup>3</sup> J)   |        |
|    |     | 4 $\beta$  | 2.55 | dd | 15.85 ( <sup>2</sup> J) / 8.64 ( <sup>3</sup> J) | 29.16  |
|    |     |            |      |    |                                                  |        |
|    | B-u | 1'         | -    | -  | -                                                | 134.69 |
|    |     | 2'         | 6.92 | d  | 1.71 ( <sup>4</sup> J)                           | 115.72 |
|    |     | 3' (OH)    | 7.80 | s  | -                                                | 147.25 |
|    |     | 4'         | -    | -  | -                                                | 147.45 |
|    |     | 5'         | 6.22 | d  | 8.38 ( <sup>3</sup> J)                           | 115.96 |
|    |     | 6'         | 6.78 | dd | 8.38 ( <sup>3</sup> J) / 1.8 ( <sup>4</sup> J)   | 119.72 |
|    | A-l | 4a         | -    | -  | -                                                | 101.79 |
|    |     | 5 (OH)     | 8.27 | s  | -                                                | 153.33 |
|    |     | 6          | 6.19 | s  | -                                                | 96.17  |
|    |     | 7 (OH)     | 8.17 | s  | -                                                | 149.67 |
|    |     | 8          | -    | -  | -                                                | 125.03 |
|    |     | 8a         | -    | -  | -                                                | 149.05 |
|    | C-l | 2          | 4.66 | d  | 7.32 ( <sup>3</sup> J)                           | 82.68  |
|    |     | 3          | 3.98 | m  | -                                                | 67.97  |
|    |     | 3 (OH)     | 4.05 | s  | -                                                |        |
|    |     | 4 $\alpha$ | 2.93 | dd | 10.17 ( <sup>2</sup> J) / 5.02 ( <sup>3</sup> J) |        |
|    |     | 4 $\beta$  | 2.62 | dd | 16.34 ( <sup>2</sup> J) / 7.86 ( <sup>3</sup> J) | 28.60  |
|    |     |            |      |    |                                                  |        |
|    | B-l | 1'         | -    | -  | -                                                | 131.63 |
|    |     | 2'         | 6.71 | d  | 1.71 ( <sup>4</sup> J)                           | 114.88 |
|    |     | 3' (OH)    | 7.83 | s  | -                                                | 146.72 |
|    |     | 4'         | -    | -  | -                                                | 145.90 |
|    |     | 5'         | 6.73 | d  | 8.11 ( <sup>3</sup> J)                           | 115.69 |
|    |     | 6'         | 6.64 | dd | 7.93 ( <sup>3</sup> J) / 1.59 ( <sup>4</sup> J)  | 119.92 |
| N8 | A-u | 4a         | -    | -  | -                                                | 100.24 |
|    |     | 5 (OH)     | 8.36 | s  | -                                                | 157.41 |
|    |     | 6          | 6.01 | d  | 2.1 ( <sup>4</sup> J)                            | 95.90  |
|    |     | 7 (OH)     | 7.88 | s  | -                                                | 157.92 |
|    |     | 8          | 5.61 | d  | 2.34 ( <sup>4</sup> J)                           | 96.98  |
|    |     | 8a         | -    | -  | -                                                | 155.97 |
|    | C-u | 2          | 4.06 | d  | 9.58 ( <sup>3</sup> J)                           | 79.04  |
|    |     | 3          | 4.01 | m  | -                                                | 66.22  |
|    |     | 4 $\alpha$ | 2.95 | dd | 10.12 ( <sup>2</sup> J) / 5.40 ( <sup>3</sup> J) | 27.95  |
|    |     |            |      |    |                                                  |        |

|            |             |      |    |                                   |        |
|------------|-------------|------|----|-----------------------------------|--------|
|            | 4 $\beta$   | 2.53 | dd | 14.29 ( $^2J$ ) / 11.08 ( $^3J$ ) |        |
| <b>B-u</b> | 1'          | -    | -  | -                                 | 89.61  |
|            | 2' $\alpha$ | 2.71 | d  | 12.03 ( $^2J$ )                   | 45.20  |
|            | 2' $\beta$  | 2.49 | d  | 12.03 ( $^2J$ )                   |        |
|            | 3' (OH)     | 5.78 | s  | -                                 | 94.80  |
|            | 4'          | -    | -  | -                                 | 192.69 |
|            | 5'          | 6.38 | s  | -                                 | 112.91 |
|            | 6'          | -    | -  | -                                 | 162.57 |
| <b>A-l</b> | 4a          | -    | -  | -                                 | 103.96 |
|            | 5 (OH)      | 9.72 | s  | -                                 | 164.46 |
|            | 6           | 6.22 | s  | -                                 | 90.84  |
|            | 7           | -    | -  | -                                 | 167.13 |
|            | 8           | -    | -  | -                                 | 105.43 |
|            | 8a          | -    | -  | -                                 | 154.73 |
| <b>C-l</b> | 2           | 4.86 | d  | 7.84 ( $^3J$ )                    | 83.46  |
|            | 3           | 4.12 | m  | -                                 | 67.70  |
|            | 3 (OH)      | 4.23 | s  | -                                 |        |
|            | 4 $\alpha$  | 2.98 | dd | 11.16 ( $^2J$ ) / 5.40 ( $^3J$ )  |        |
|            | 4 $\beta$   | 2.95 | dd | 16.18 ( $^2J$ ) / 8.41 ( $^3J$ )  | 28.55  |
| <b>B-l</b> | 1'          | -    | -  | -                                 | 131.16 |
|            | 2'          | 6.94 | d  | 1.51 ( $^4J$ )                    | 115.04 |
|            | 3' (OH)     | 7.97 | s  | -                                 | 145.88 |
|            | 4' (OH)     | 7.92 | s  | -                                 | 146.06 |
|            | 5'          | 6.83 | d  | 7.97 ( $^3J$ )                    | 116.02 |
|            | 6'          | 6.80 | dd | 7.97 ( $^3J$ ) / 1.69 ( $^4J$ )   | 119.98 |

**Figure S2** - 2D  $^1\text{H}/^{13}\text{C}$  HMBC, top 1D  $^1\text{H}$ , side 1D  $^{13}\text{C}$  spectrum (a) N2; (b) N3; (c) N4; (d) N6 and (e) N8

**(a)- N2**

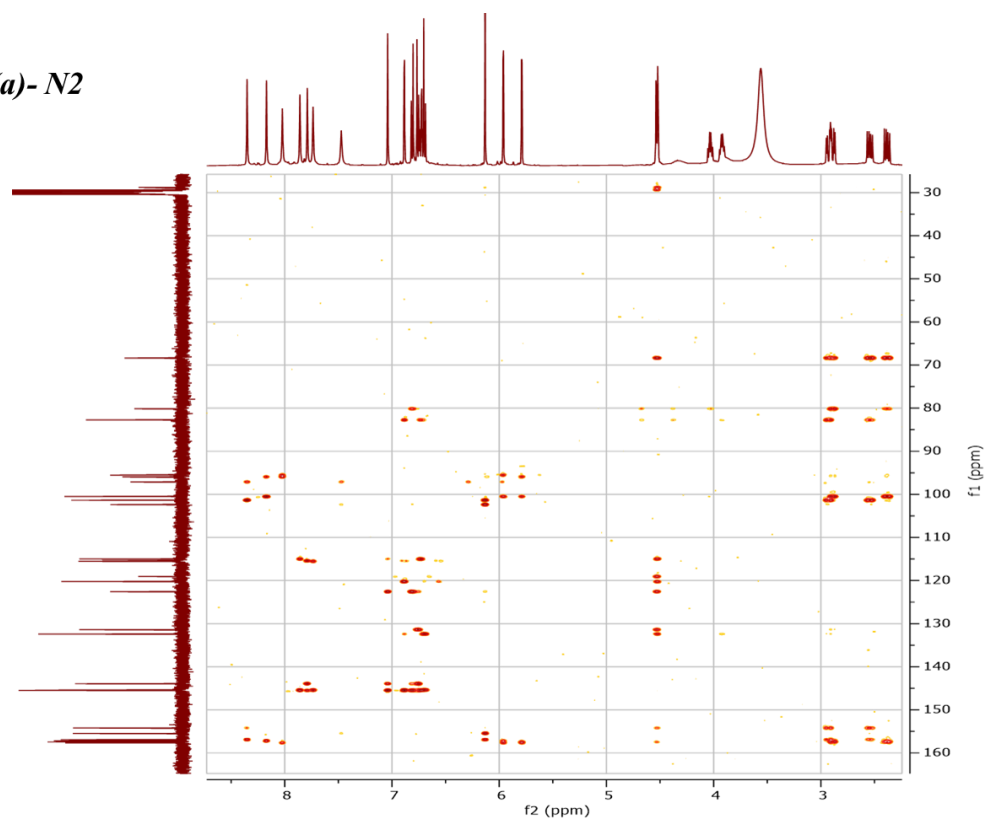

**(b) - N3**

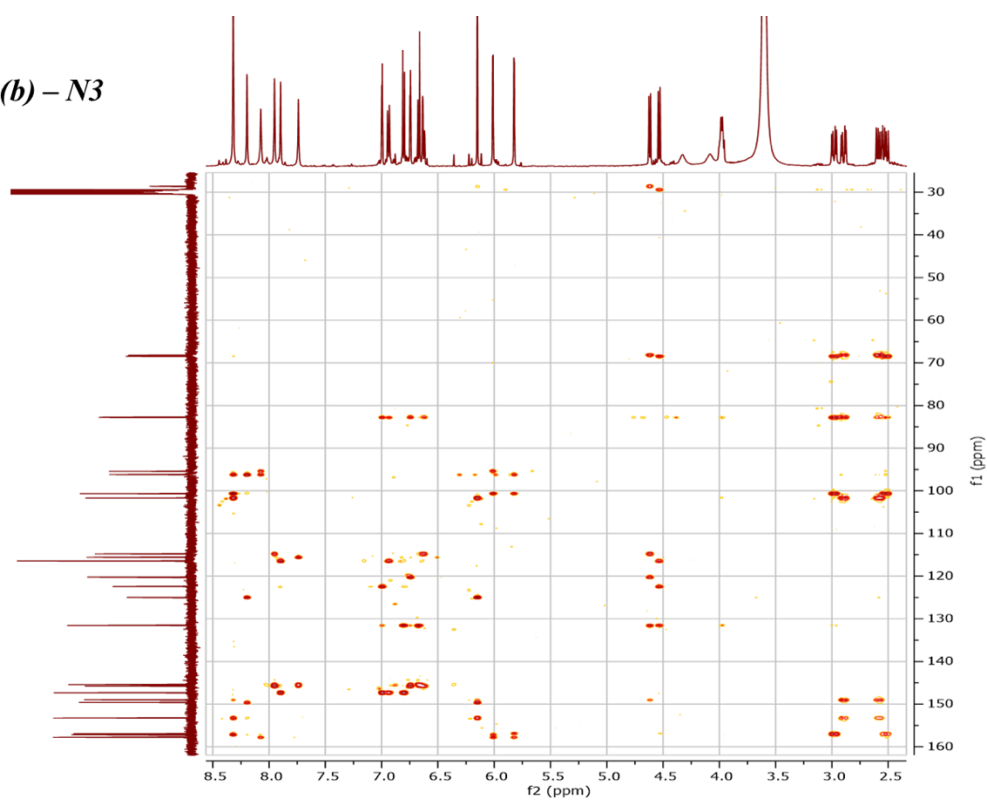

(c) – N4

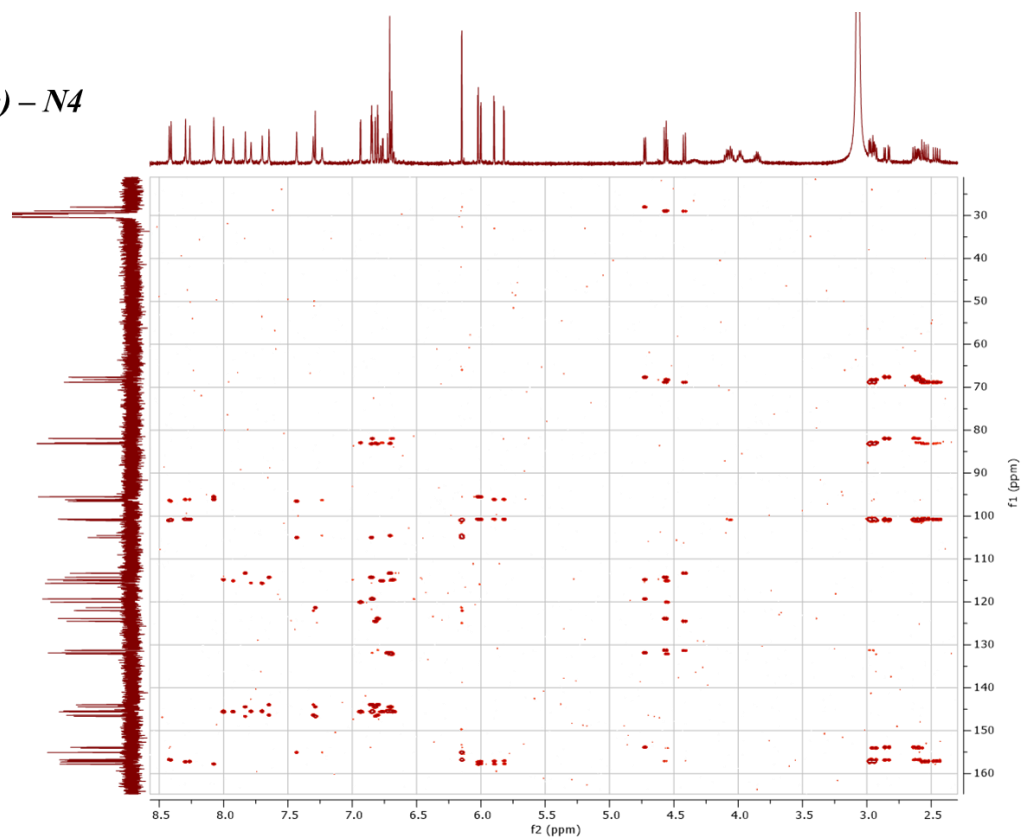

(d) – N6

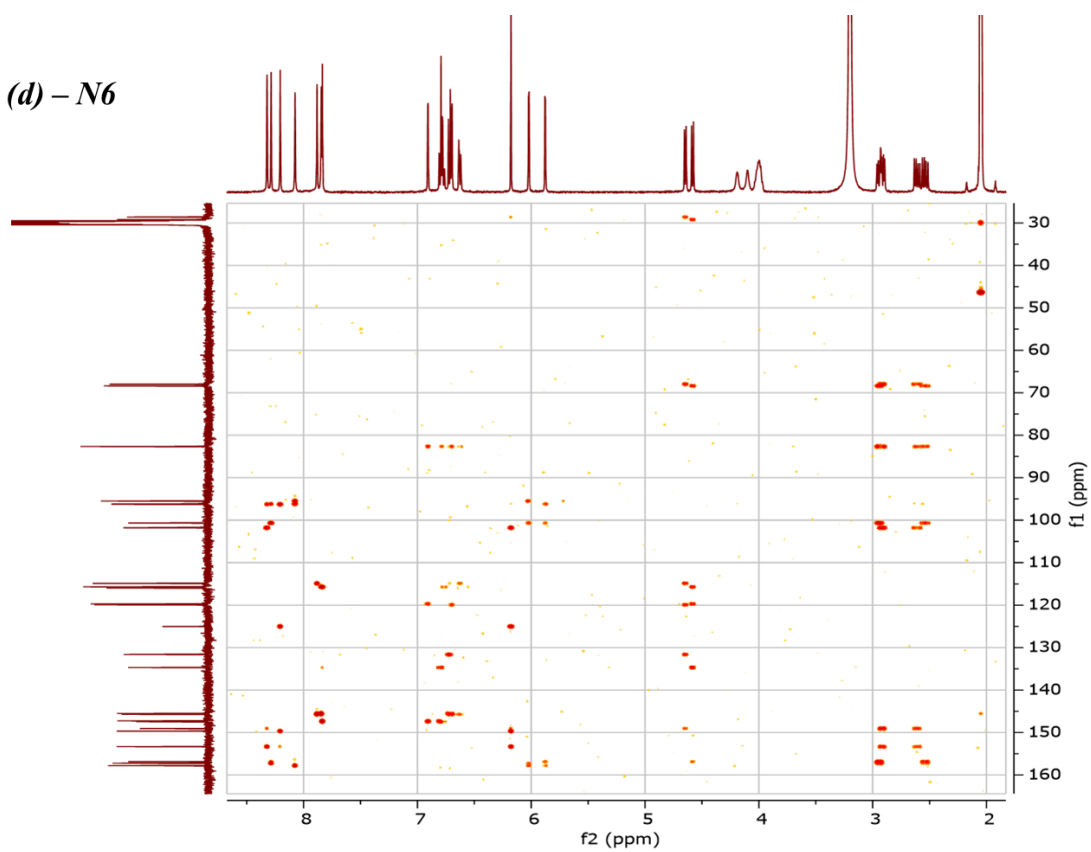



*(e)* - N8

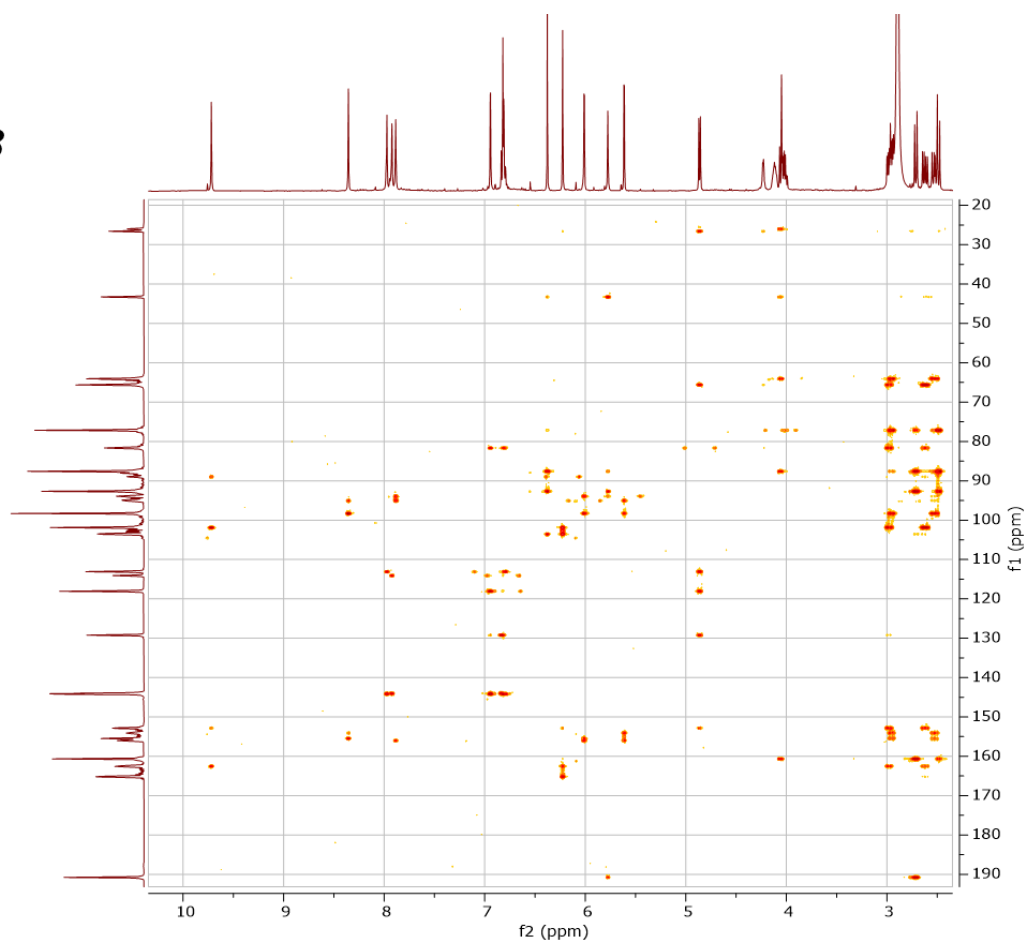

**Figure S3** -  $^1\text{H}$  2D ROESY spectrum showing correlations (in blue) between phenolic and aromatic protons, ROE correlations between phenolic protons due to chemical exchange appear in red (a) N2; (b) N3; (c) N4; (d) N6 and (e) N8

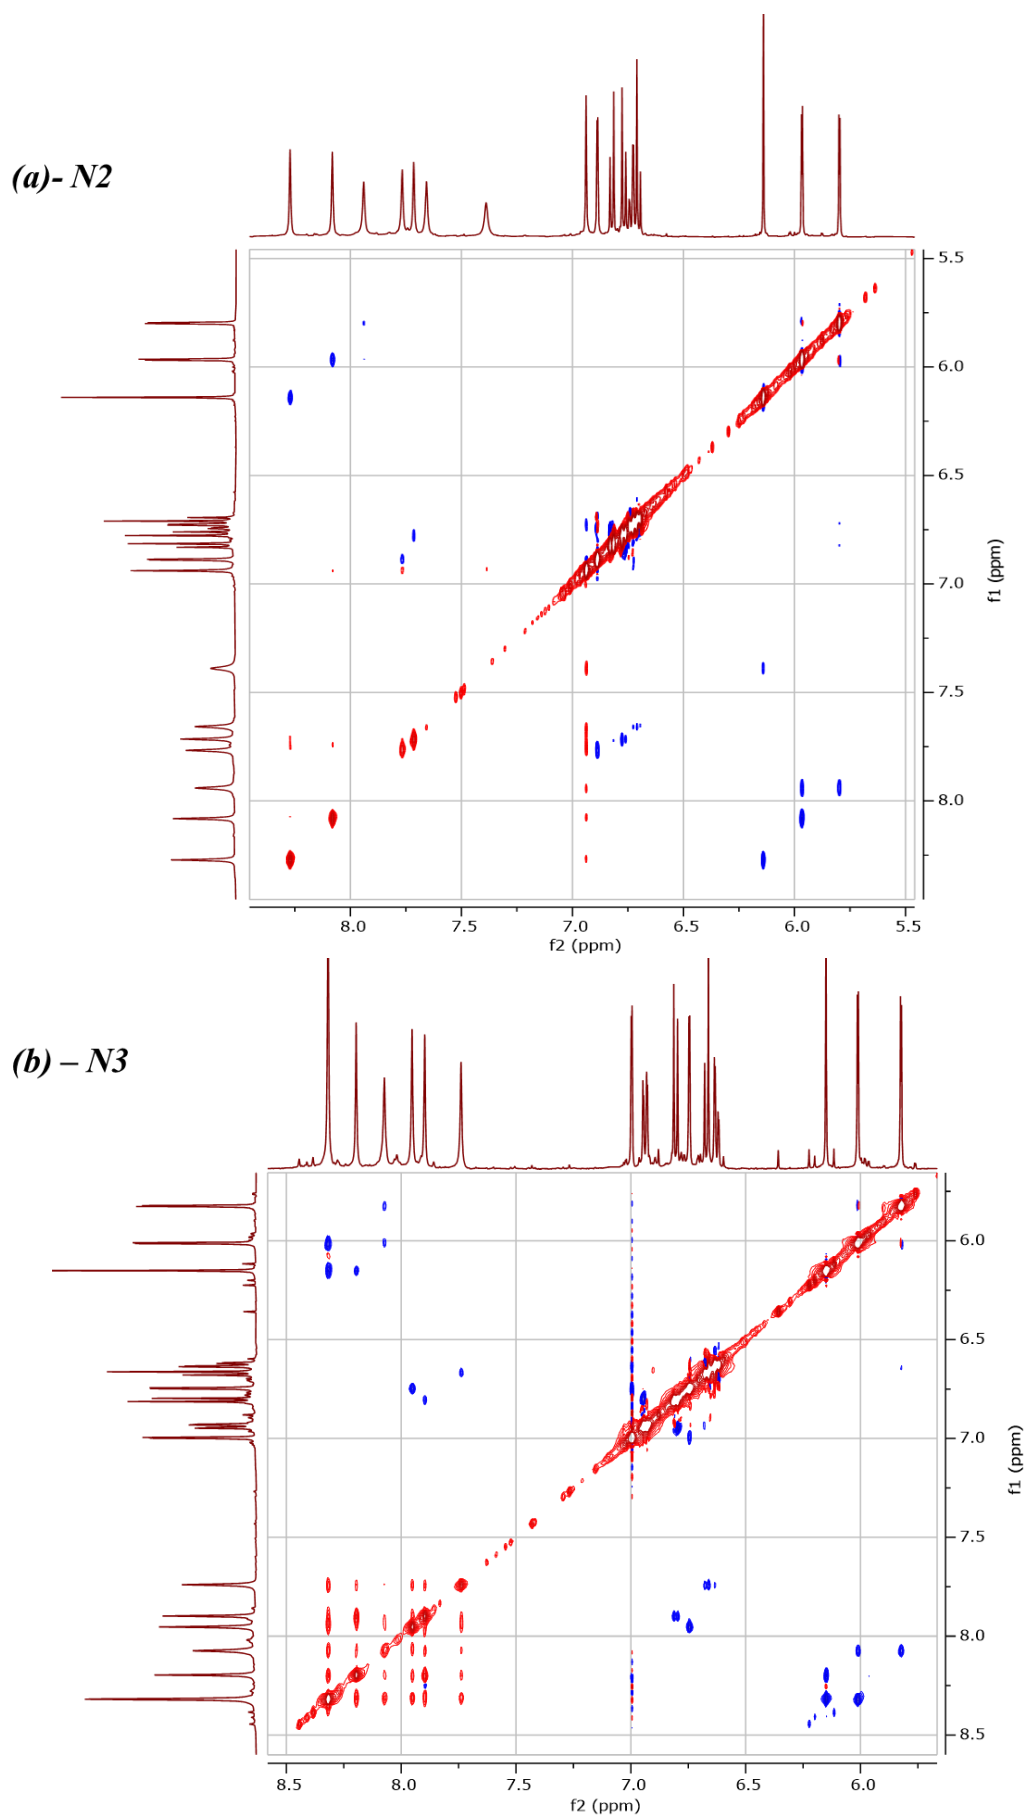

*(c) – N4*

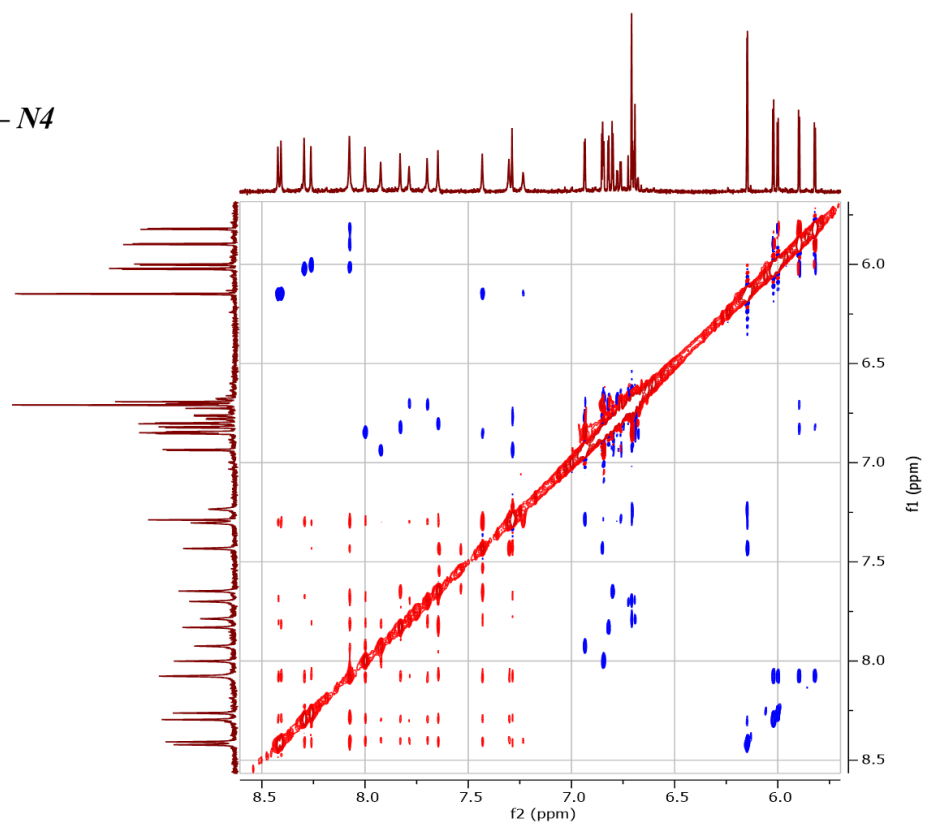

*(d) – N6*

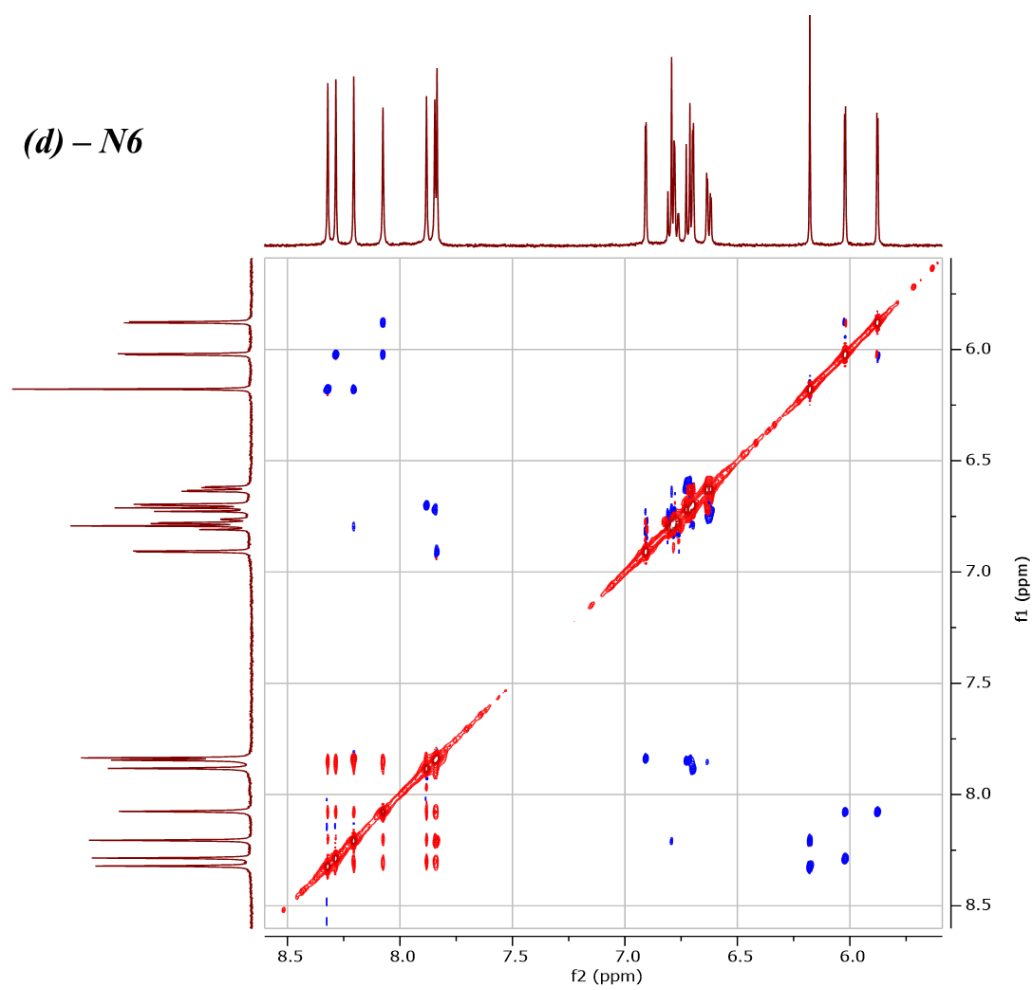

*(e) - N8*

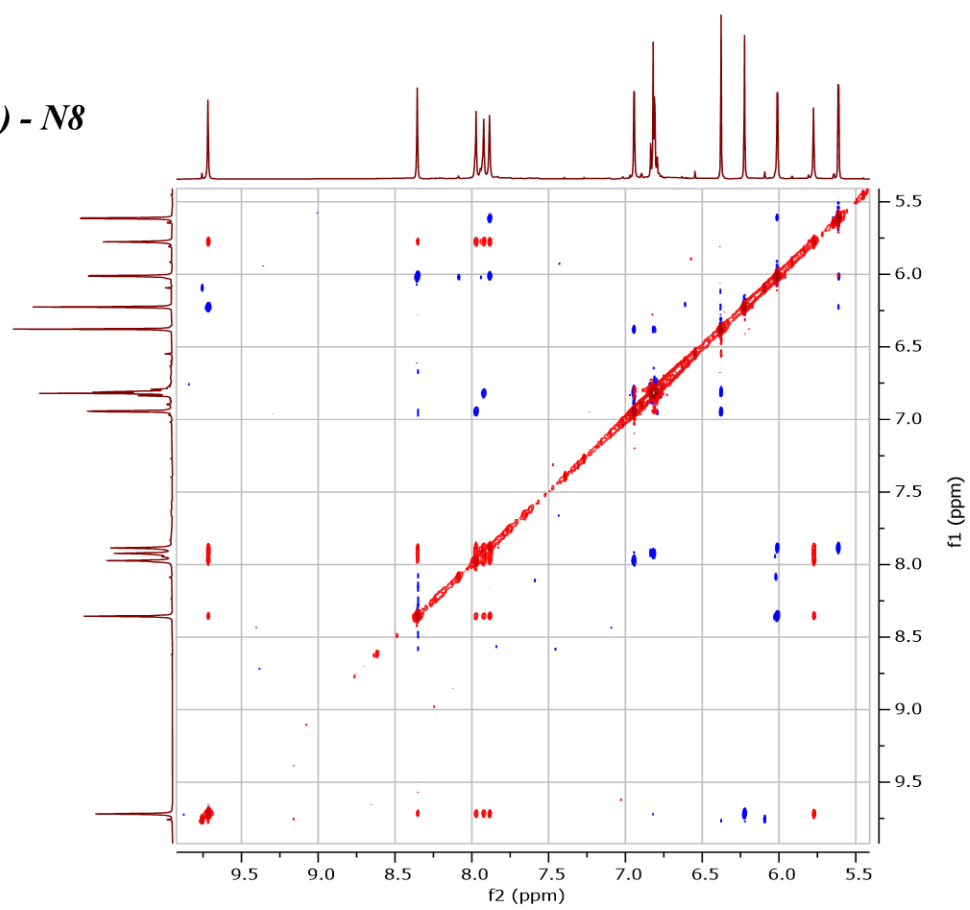

Supplement: s1 [file s1]
